# Supplementary material for: O/N-carbon dots as a fluorescent nanoprobe for sensitive COX-2 inhibitor detection: comprehensive validation and application to pharmacokinetic studies in rats with acute liver injury
Source: Royal Society of Chemistry journal article supplement (doi:10.1039/d6ra00452k), 2026-03-18
Supplement: d6ra00452k1.pdf [file d6ra00452k1.pdf]

## **O/N-carbon dots as a fluorescent nanoprobe for sensitive COX-2 inhibitor detection: comprehensive validation and application to pharmacokinetic studies in rats with acute liver injury**

**Doaa H. Rushdy<sup>1</sup>, Almontaser Bellah H. Ali<sup>2\*</sup>, Wesam M. El-Koussi<sup>1</sup>, Noha N. Atia<sup>2</sup>**

<sup>1</sup> Department of Pharmaceutical Analytical Chemistry, Faculty of Pharmacy, Sohag University, Sohag 82524, Egypt

<sup>2</sup> Department of Pharmaceutical Analytical Chemistry, Faculty of Pharmacy, Assiut University, Assiut 71515, Egypt

Corresponding author: **Doaa H. Rushdy**

Department of Pharmaceutical Analytical Chemistry, Faculty of Pharmacy

Sohag University, Sohag 82524, Egypt

\*e-mail: [doaa.hassan@pharm.sohag.edu.eg](mailto:doaa.hassan@pharm.sohag.edu.eg)

## Quantum yield

We determined the quantum yield (QY) of the O/N-CDs using aqueous quinine sulfate (QS) as a reference (QY = 0.54 in 0.1 M H<sub>2</sub>SO<sub>4</sub>). For both O/N-CDs and QS, we measured absorbance (<0.05) and recorded emission spectra under identical conditions. The QY was calculated from the integrated emission areas using:

$$\Phi_{\text{O/N-CDs}} = \Phi_{\text{QS}} (F_{\text{O/N-CDs}}/F_{\text{QS}}) (A_{\text{QS}}/A_{\text{O/N-CDs}}) (\eta_{\text{O/N-CDs}}/\eta_{\text{QS}})^2$$

$\Phi_{\text{O/N-CDs}}$  denotes the QY of O/N-CDs, while  $\Phi_{\text{QS}}$  indicates the QY of QS.  $F_{\text{O/N-CDs}}$  corresponds to the fluorescence intensity of O/N-CDs, and  $F_{\text{QS}}$  represents the fluorescence intensity of QS.  $A$  signifies the absorbance value, and  $\eta$  represents the refractive index of the solvent, specifically distilled water. The synthesized O/N-CDs were dissolved in distilled water, which has a refractive index of 1.33, while QS was dissolved in a 0.1 M H<sub>2</sub>SO<sub>4</sub> solution, also with a refractive index of 1.33.

## Figures

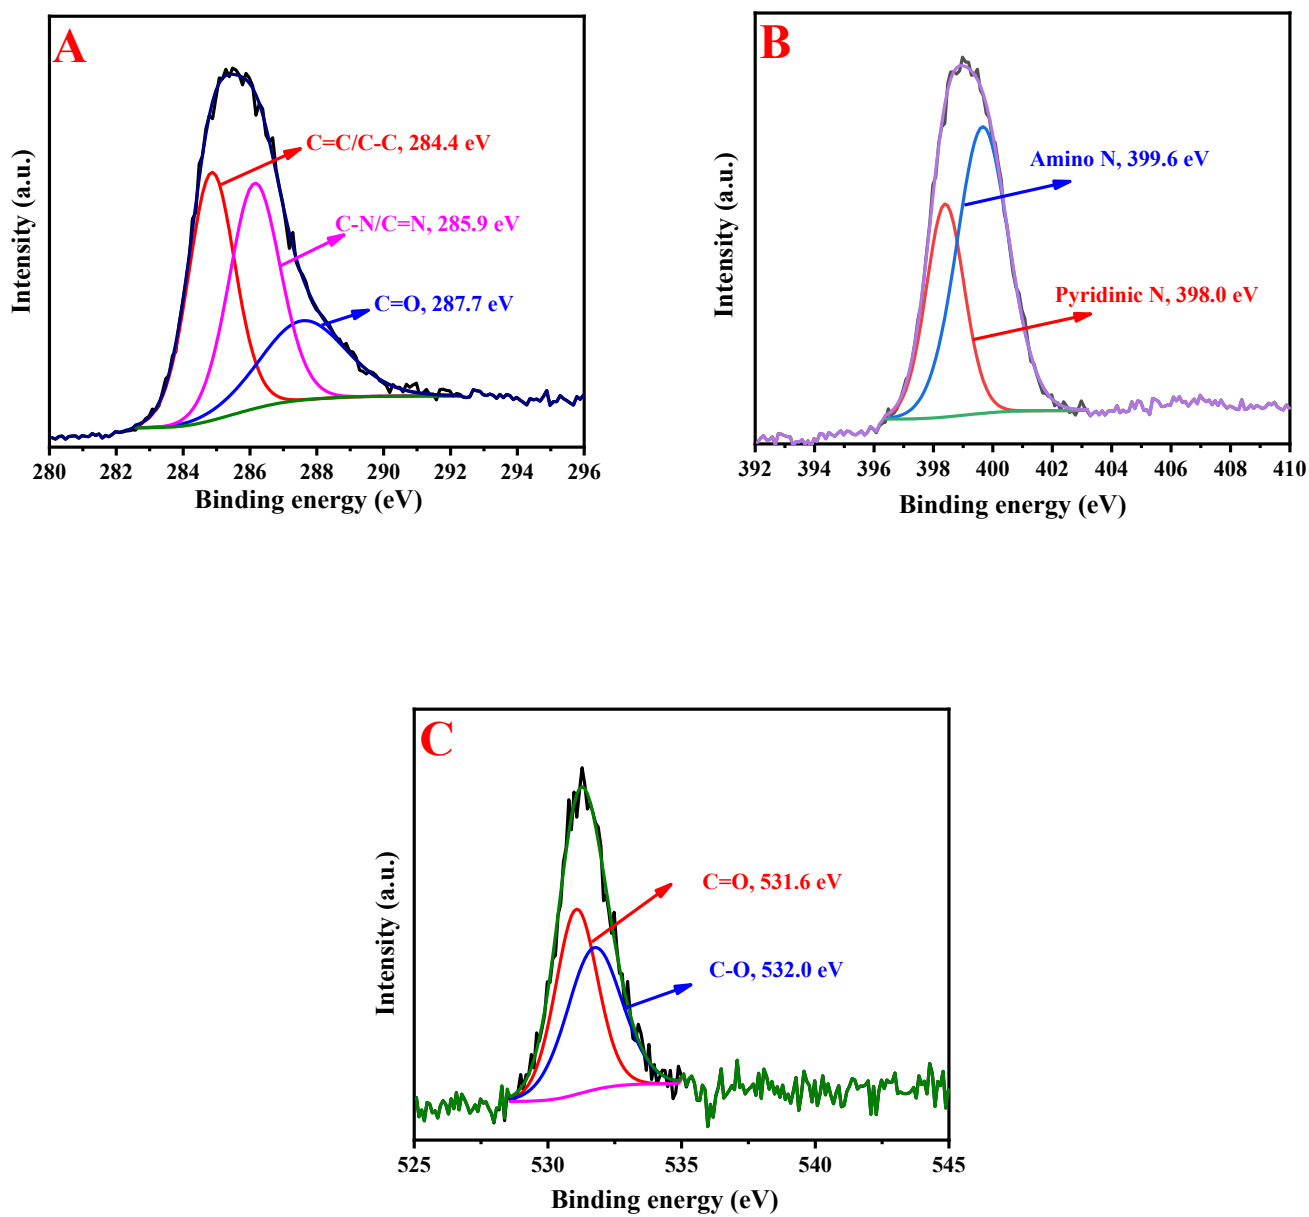

Fig. S1 (A) C 1s, (B) N 1s, and (C) O 1s spectra of O/N-CDs.

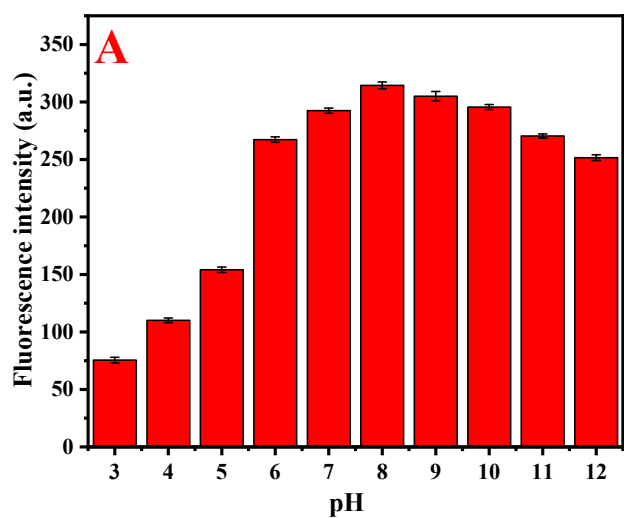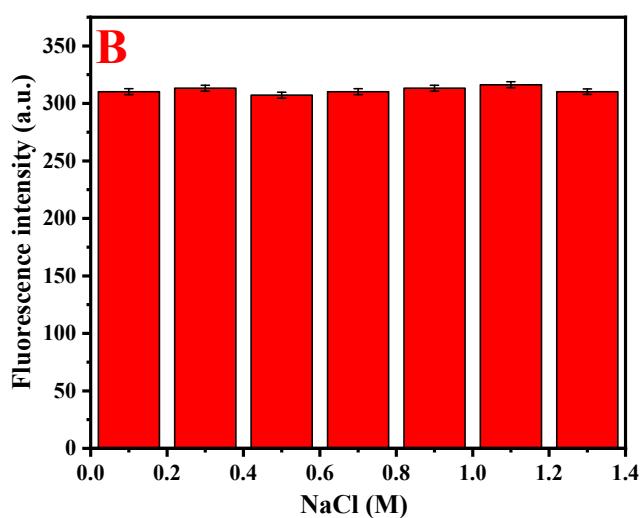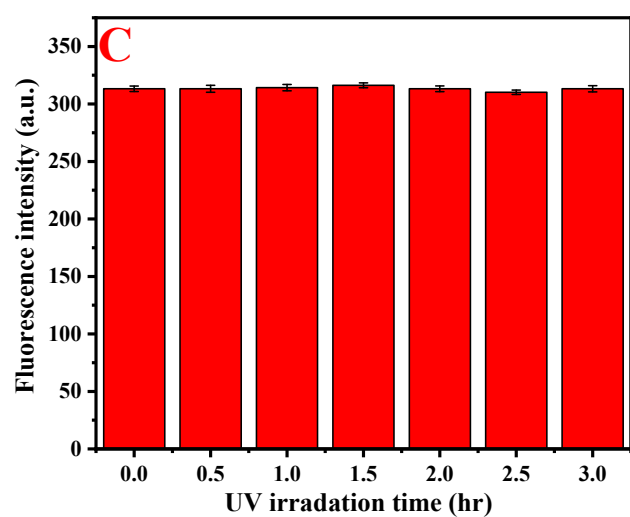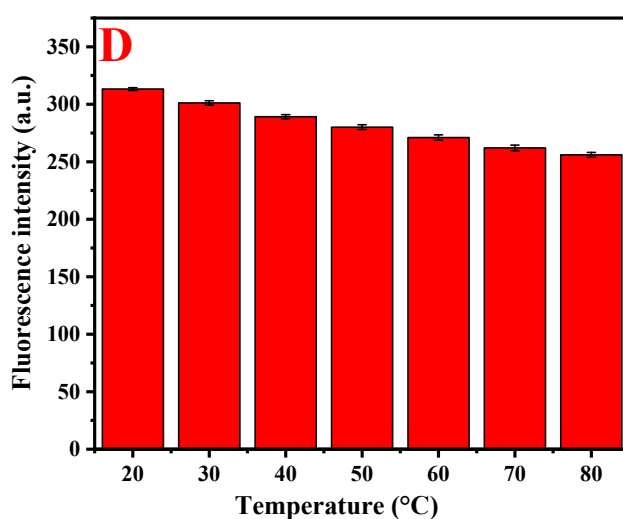

**Fig. S2** The influence of (A) pH (3–12), (B) ionic strength (0.1–1.3 M), (C) UV irradiation duration (0–3 hr), and (D) temperature (20–80 °C) on the fluorescence intensity of O/N-CDs.

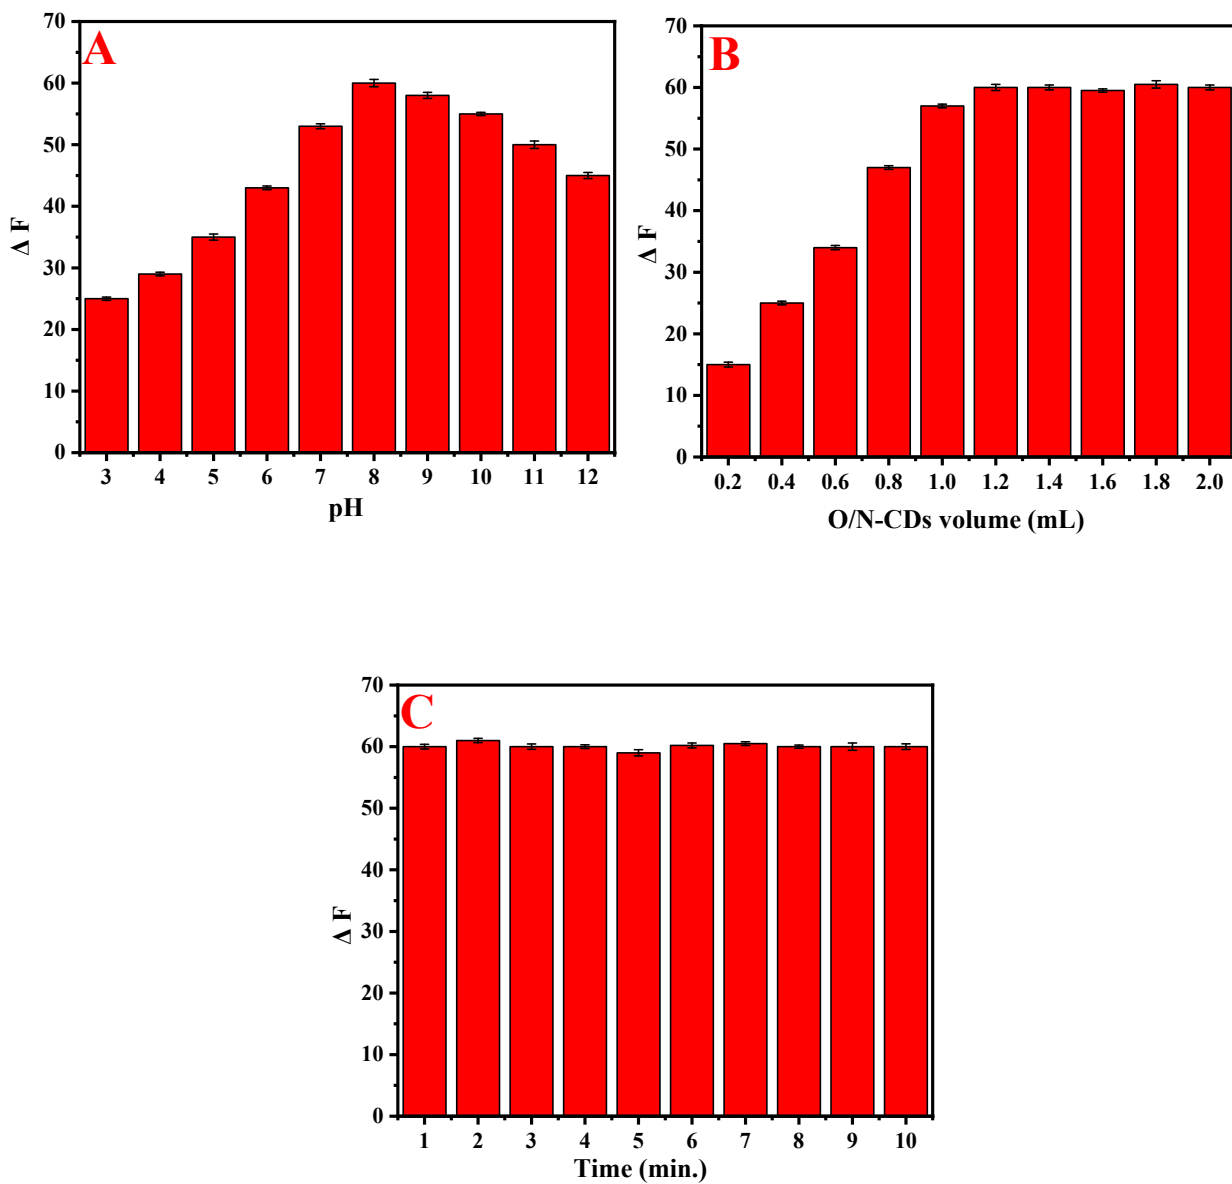

**Fig. S3** Influence of the factors affecting  $\Delta F$  and interactions between O/N-CDs and ETX (200 ng/mL) (A) pH (3–12), (B) volume of O/N-CDs (0.2–2 mL), (C) incubation time (1–10 min.).

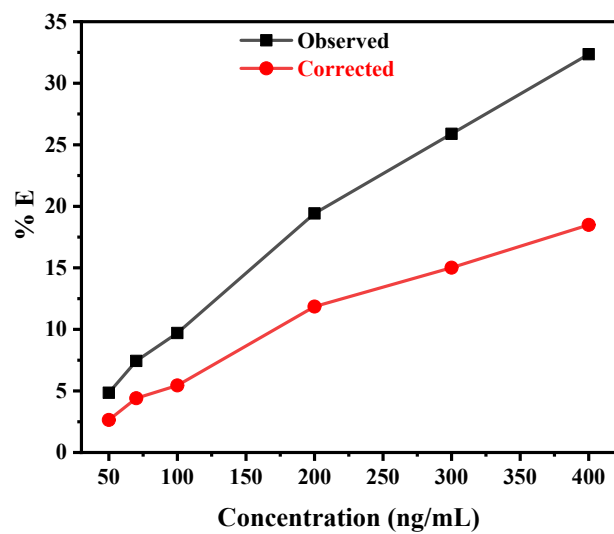

**Fig. S4** Suppressed efficiency (%E) of observed and corrected fluorescence of O/N-CDs after the addition of ETX.

**A**

**Assessment Visual - Letter M**

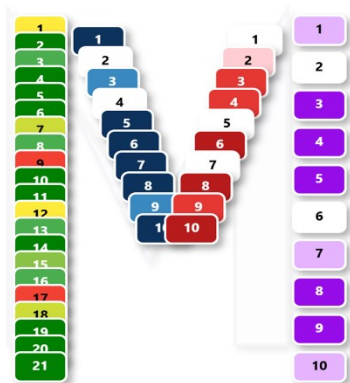

**73.1**  
GEMAM  
21 Questions

**80.0**  
BAGI  
10 Questions

**62.5**  
RAPI  
10 Questions

**65.0**  
VIGI  
10 Questions

**Final Assessment - Letter A**

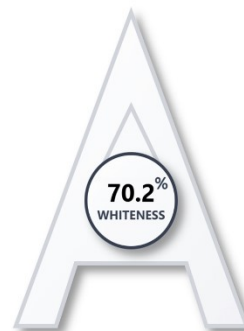

**70.2%**

Final Whiteness Score

Good analytical method with room for improvement

**B**

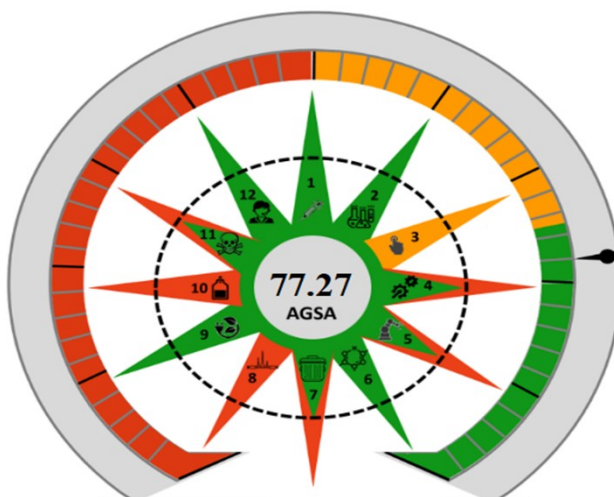

**Fig. S5** (A) MA whiteness assessment score (B) AGSA score of the method developed to determine O/N-CDs and ETX mixture.

## Tables

**Table S1:** Accuracy and precision studies of ETX

| Conc.<br>(ng/mL) | Accuracy      | Precision            |                         |
|------------------|---------------|----------------------|-------------------------|
|                  |               | Intra-day            | Inter-day               |
|                  |               | % Recovery± SD (n=6) | % Recovery± % RSD (n=3) |
| 70               | 98.48 ± 0.94  | 99.57 ± 0.86         | 99.92 ± 1.29            |
| 400              | 100.11 ± 1.37 | 100.36± 1.02         | 98.79 ± 1.77            |
| 1000             | 99.05 ± 1.58  | 99.58 ± 1.29         | 100.67± 2.17            |

**Table S2:** The quantitative statistical data for determining ETX using the proposed method in rat plasma.

| Parameter                                      | Values     |
|------------------------------------------------|------------|
| Linearity range (ng/mL)                        | 50- 1000   |
| Intercept ± SD                                 | 2.53± 1.35 |
| Slope± SD                                      | 0.27± 0.34 |
| Correlation coefficient (r)                    | 0.9991     |
| Coefficient of determination (r <sup>2</sup> ) | 0.9984     |
| LOD (ng/mL)                                    | 16.21      |
| LOQ (ng/mL)                                    | 49.11      |
